# Supplementary material for: Chemical functionalization of Kraft lignin with selected oxyethylated alcohols: From crude lignin towards novel multifunctional lignin biocomponents
Source: Research Square preprint supplement (doi:10.21203/rs.3.rs-8304317/v1), 2025-12-19
Supplement: Supplementary file 1 [file f237a24e5fc61ca57e11925a.docx]

**Supplementary Data**

Chemical functionalization of Kraft lignin with selected oxyethylated alcohols: From crude lignin towards novel multifunctional lignin biocomponents for polymer-lignin biocomposites

Janusz Nowicki٭, Ewa Sabura, Przemysław Boberski, Agata Krasuska

*Lukasiewicz Research Network - Institute of Heavy Organic Synthesis “Blachownia”, Energetykow 9, 47-225, Kedzierzyn-Kozle, Poland,*

*Corresponding author: J. Nowicki

Email: janusz.nowicki@icso.lukasiewicz.gov.pl

ORCID : 0000-0001-5265-0417


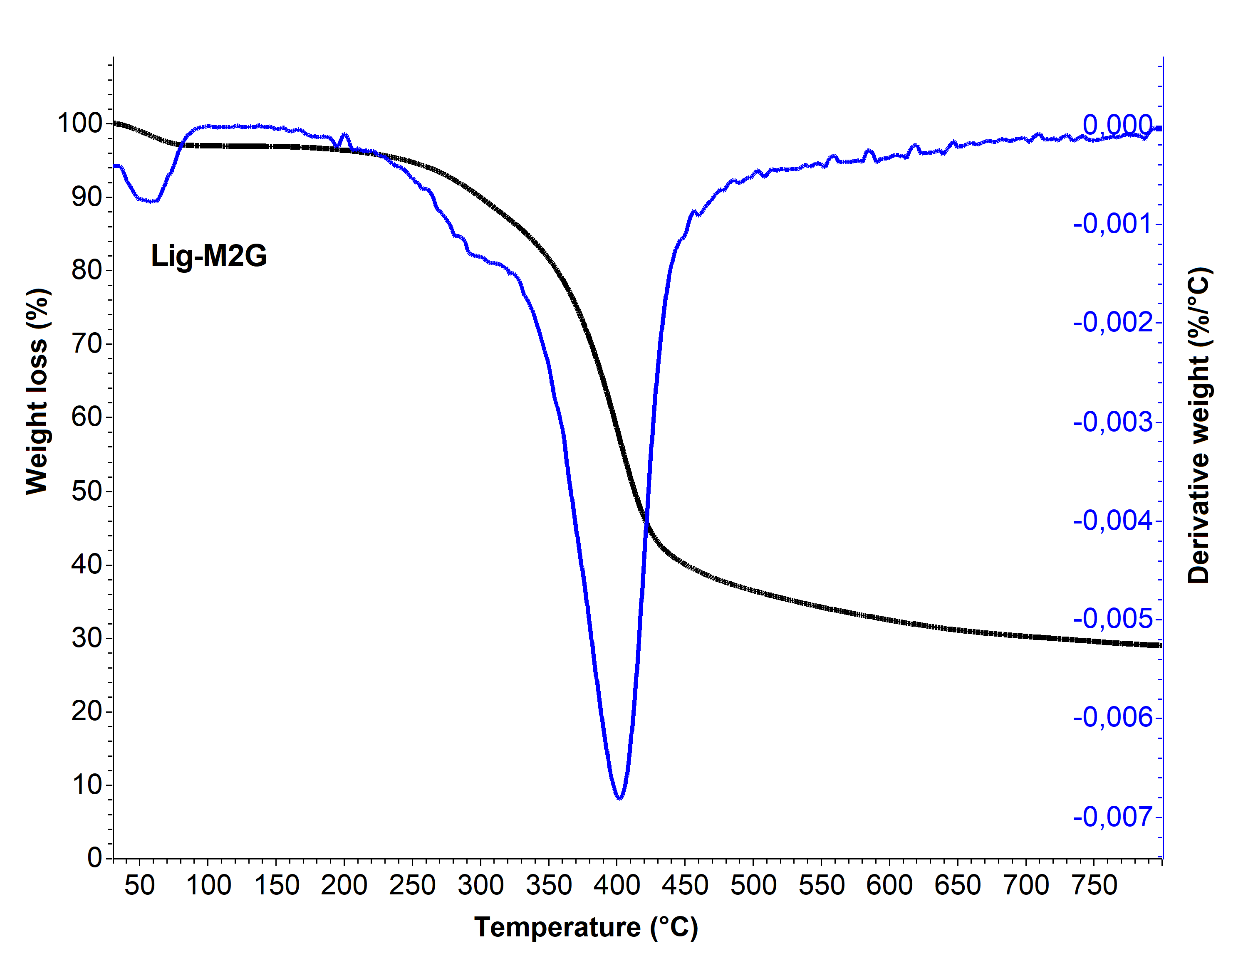


**Fig. S1**. Thermogram of Lig-M2G sample


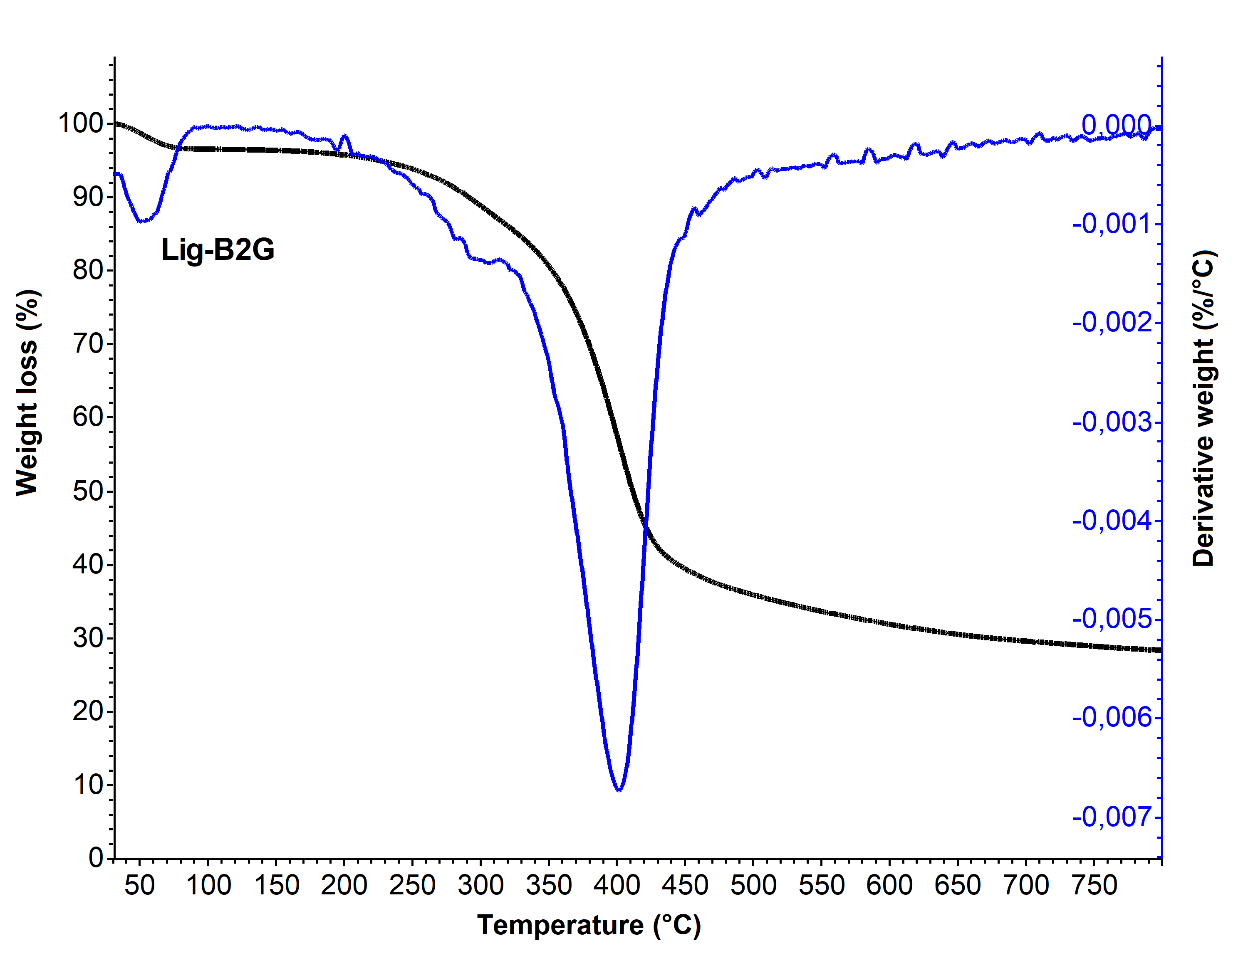


**Fig. S2**. Thermogram of Lig-B2G sample


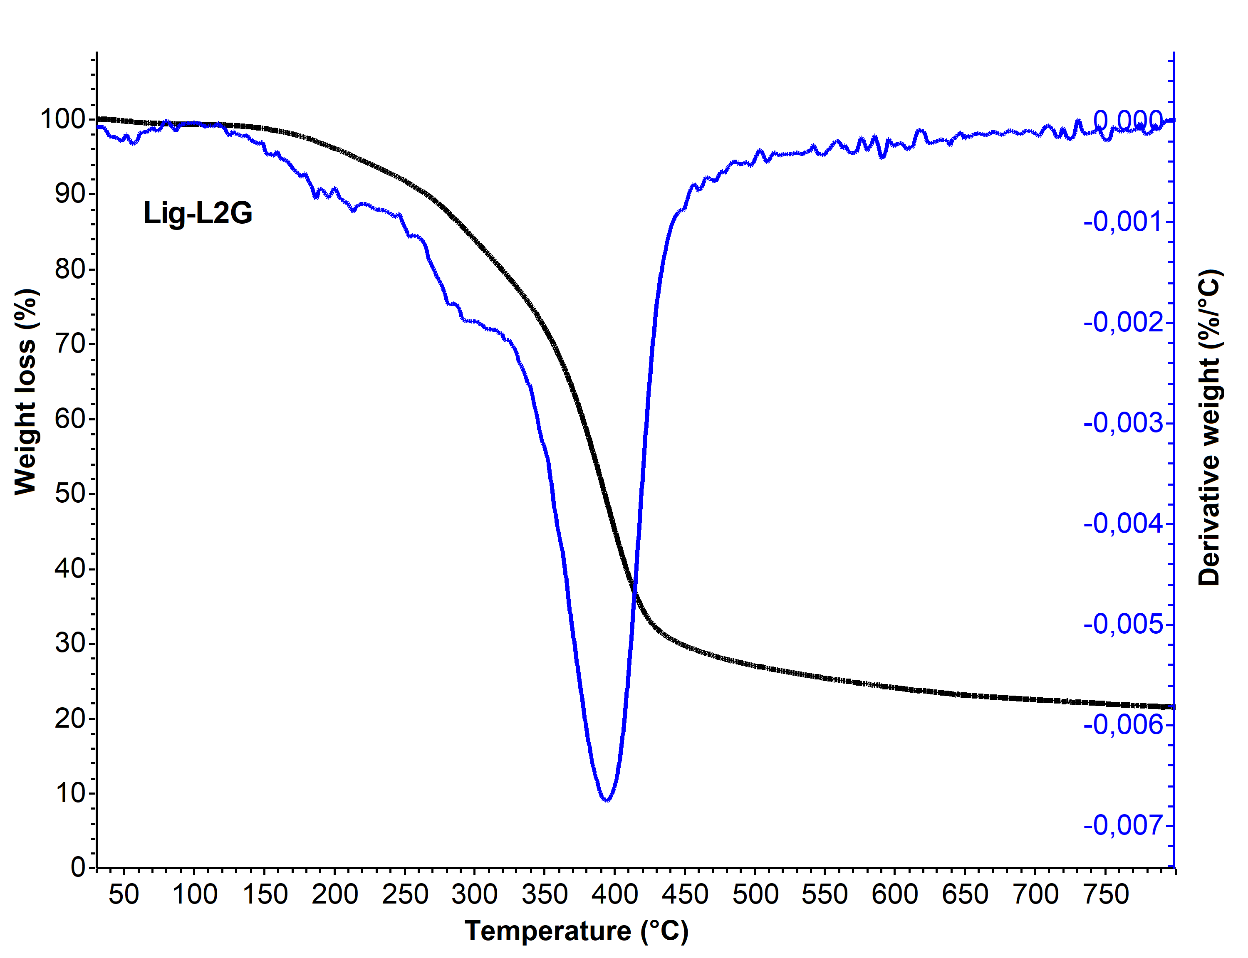


**Fig. S3**. Thermogram of Lig-L2G sample


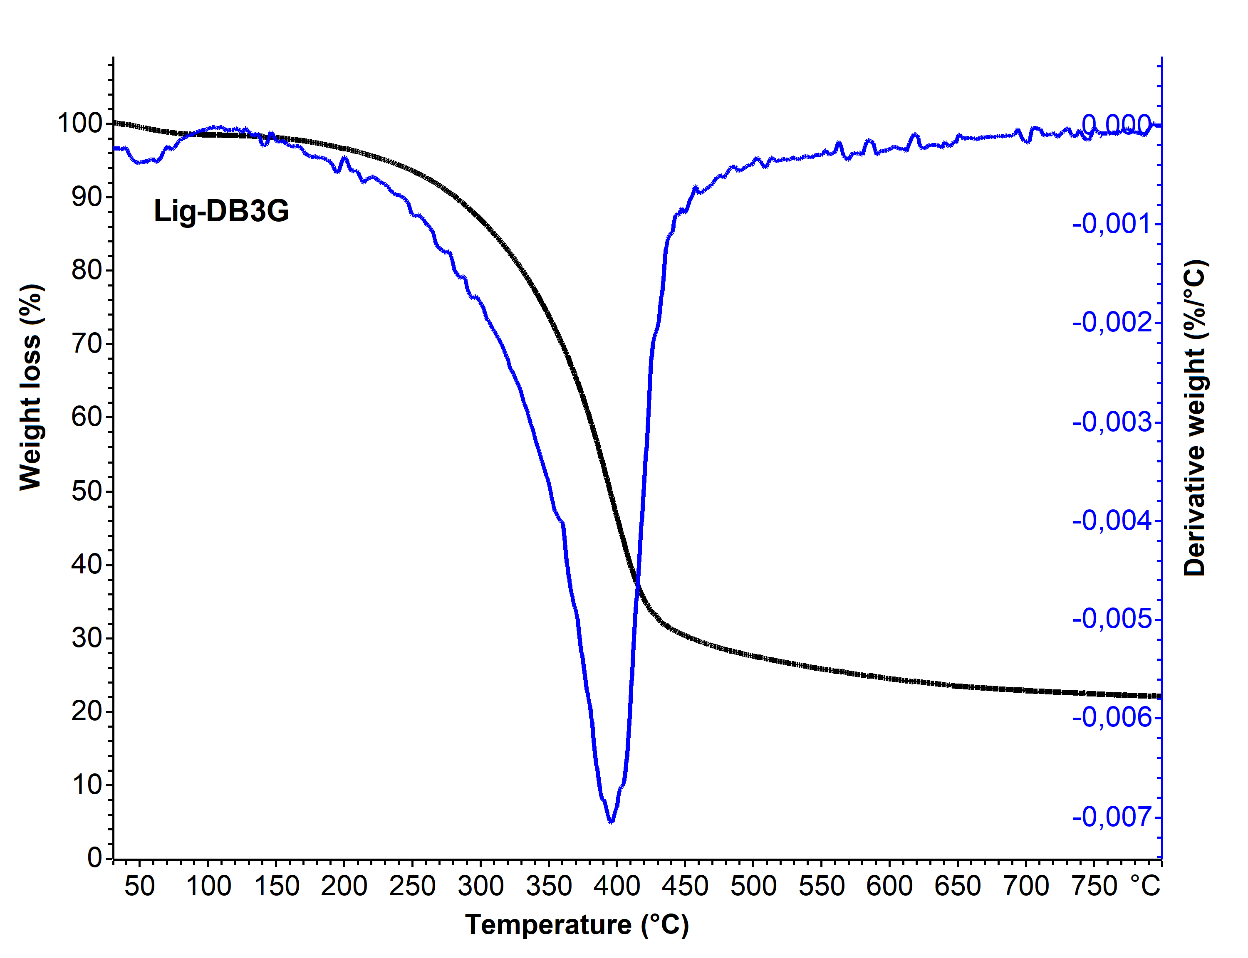


**Fig. S4**. Thermogram of Lig-DB3G sample


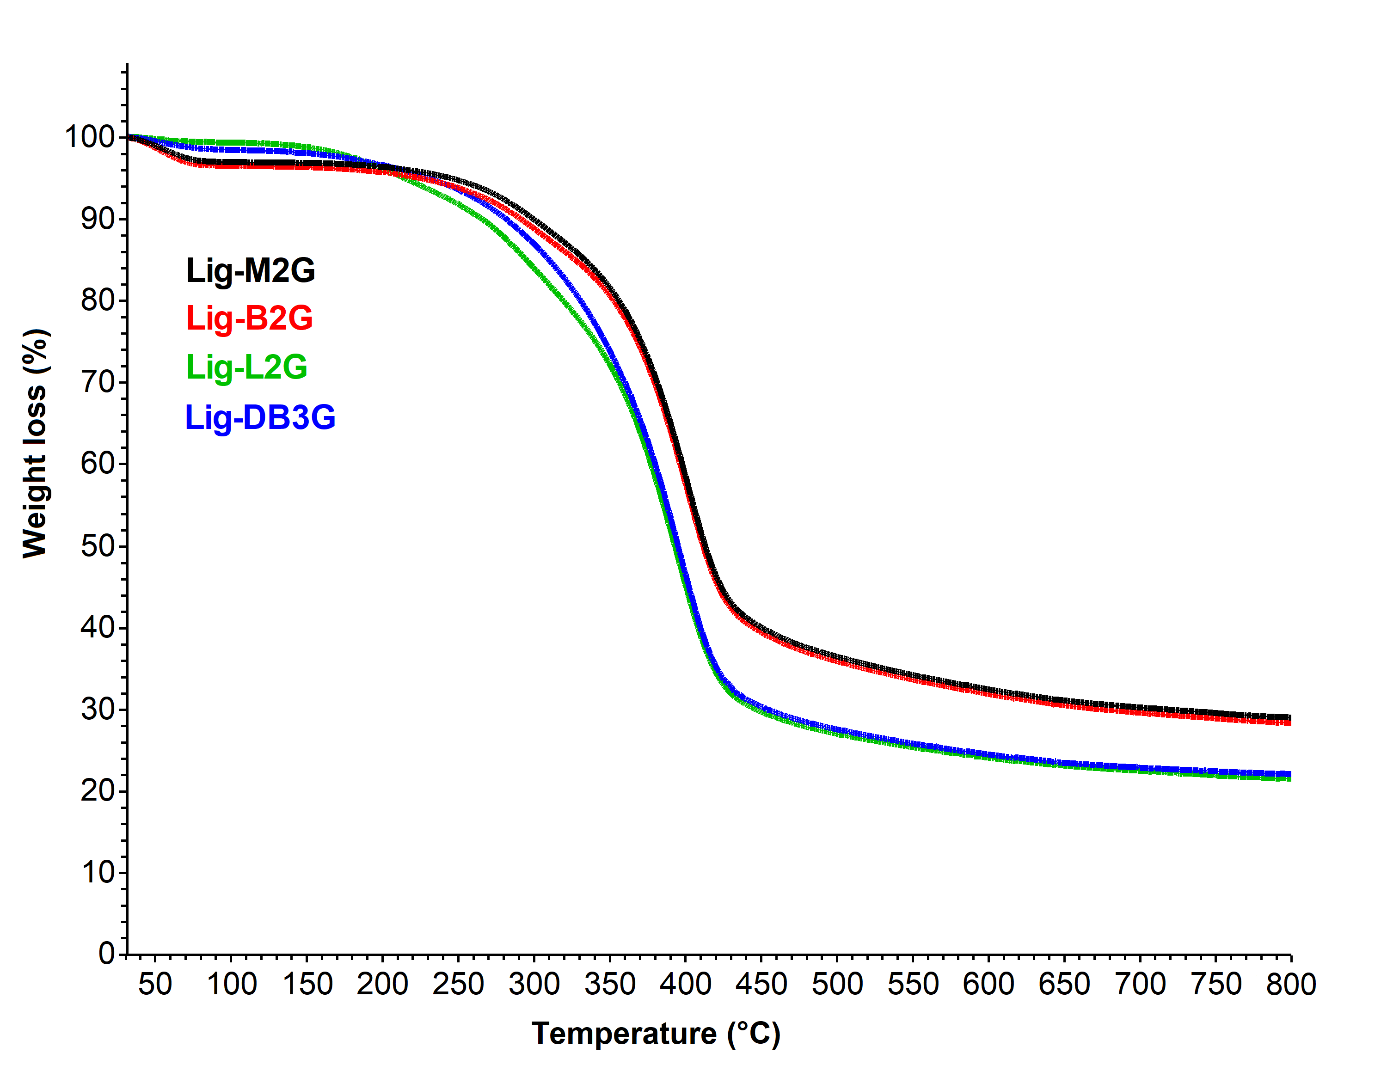


**Fig. S5**. TG thermograms of modified lignin samples
